# Supplementary material for: Structure of the RecQ C-terminal Domain of Human Bloom Syndrome Protein
Source: PubMed Central journal article supplement (PMC6505963; doi:10.1038/srep03294), 2013-11-21
Supplement: srep03294-s1.pdf [file srep03294-s1.pdf]

# Structure of the RecQ C-terminal Domain of Human Bloom Syndrome Protein.

Sun-Yong Kim, Toshio Hakoshima & Ken Kitano

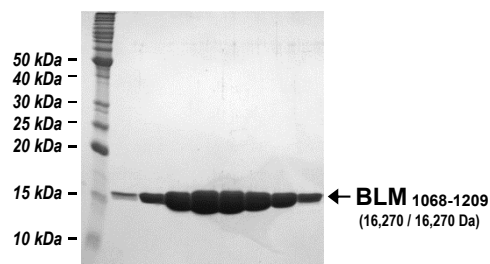

**Supplementary Fig. S1.**  
**SDS-PAGE of purified BLM RQC.**

Fractions from gel-filtration chromatography, using a HiLoad 26/60 Superdex 75pg column (GE Healthcare), were analyzed by SDS-PAGE (15% polyacrylamide gel, stained with Coomassie Blue). The sample was also analyzed by TOF-MS to compare the mass with the calculated mass based on the primary sequence (TOF-MS / calc., in parentheses).

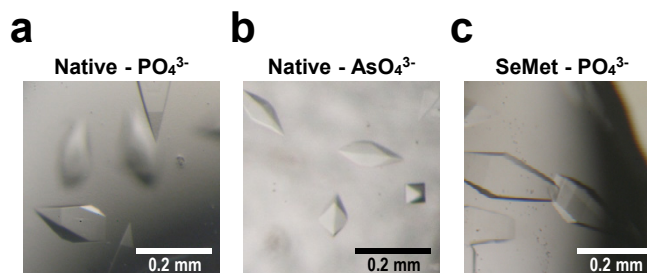

**Supplementary Fig. S2.**  
**Crystallization of BLM RQC.**

(a) Crystals of BLM RQC in complex with the phosphate ion. (b) Crystals of BLM RQC in complex with the arsenate ion. (c) Crystals of SeMet-labeled BLM RQC in complex with the phosphate ion.

**Supplementary Fig. S3.**

**Electron densities of the BLM  $\beta$ -wing.**  
A composite-omit map contoured at 1.0  $\sigma$  is superimposed (Mol-A). The BLM  $\beta$ -wing, comprising 19 residues, is slightly longer than that of WRN (16 residues).

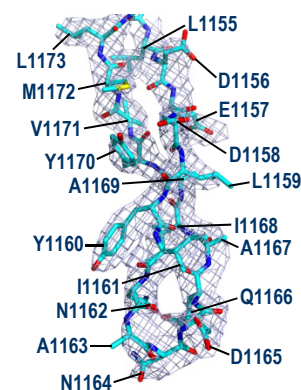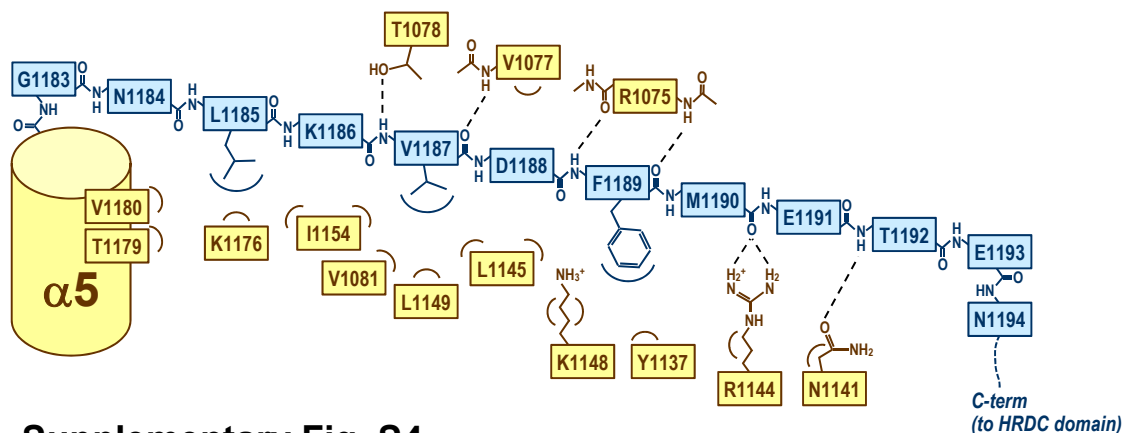

**Supplementary Fig. S4.**

**Interactions between the C-term extended loop (blue) and RQC core (yellow).**

Hydrophobic interactions are shown as curves and hydrogen bonds (< 3.3 Å) as dashed lines.
